# Supplementary material for: De novo mutation in ATP6V1B2 impairs lysosome acidification and causes dominant deafness-onychodystrophy syndrome
Source: PubMed Central journal article supplement — Cell Res. 2014 Jun 10;24(11):1370–3. doi: 10.1038/cr.2014.77 (PMC4220163; doi:10.1038/cr.2014.77), 2014-06-10
Supplement: cr201477x2.pdf [file cr201477x2.pdf]

**Supplementary information, Table S1** Filtering of SNP variants obtained in whole exome NGS

| <b>SNP Filter process</b>                     | <b>Individual 1</b> | <b>Individual 2</b> |
|-----------------------------------------------|---------------------|---------------------|
| Total                                         | 110722              | 117704              |
| Functional                                    | 14472               | 14642               |
| Filtered_1000Genomes                          | 2491                | 2545                |
| Filtered_1000Genomes_Hapmap                   | 2469                | 2521                |
| Filtered_1000Genomes_Hapmap_EVS               | 2469                | 2521                |
| Filtered_1000Genomes_Hapmap_EVS_control       | 215                 | 242                 |
| Filtered_1000Genomes_Hapmap_EVS_control_BGI   | 83                  | 96                  |
| Genes shared by individual 1 and individual 2 |                     | <b>6</b>            |
